# Supplementary material
Source: publisher site journal article supplement (https://www.dovepress.com/get_supplementary_file.php?f=325286.docx)
Supplement: Supplementary file 1 [file get_supplementary_file.php]

| Antibiotics | MRSA252 | | BJ2 | | GZ9 | | CQ19 | |
| --- | --- | --- | --- | --- | --- | --- | --- | --- |
| MIC | Interpretation | MIC | Interpretation | MIC | Interpretation | MIC | Interpretation |
| Vancomycin | <=0.5 | S | 1* | S | 1 | S | 1* | S |
| Linezolid | 2 | S | 2 | S | 2 | S | 2 | S |
| Teicoplanin | 2 | S | 4 | S | 2 | S | 4 | S |
| Daptomycin | 1 | S | 1 | S | 1 | S | 0.5 | S |
| +Clarithromycin |  | R |  | S |  | S |  | R |
| Erythromycin | >=8 | R | <=0.25 | S | <=0.25 | S | >=8 | R |
| Clindamycin | >=4 | R | 0.25 | S | 0.25 | S | >=4 | R |
| Tigecycline | <=0.12 | S | <=0.12 | S | <=0.12 | S | <=0.12 | S |
| Rifampicin | <=0.5 | S | >=32 | R | >=32 | R | <=0.5 | S |
| Trimethoprim/Sulfamethoxazole | <=10 | S | <=10 | S | <=10 | S | <=10 | S |

Table S. Analysis of MRSA252, BJ2, GZ9 and CQ19 resistance to ten antibiotics

Figure legend: Analysis of MRSA252, BJ2, GZ9 and CQ19 resistance to ten antibiotics. MIC: Minimum inhibitory concentration, S: Sensitive, R: Resistance,

+: Deduced drug, *: AES modified. The resistance analysis was performed by Department of Laboratory Medicine of Southwest Hospital of Army Medical University (MIC Interpretation Guideline: 2020 Copy of Global CLSI-based).
